# Supplementary material
Source: PubMed Central journal article supplement (PMC1351369)
Supplement: nar_34_2_613__1.pdf [file nar_34_2_613__1.pdf]

## Supplemental Figure legends

### Figure S1

#### Editing sites in psbA defined by differences in genomic and cDNA sequences.

The genomic sequence of the psbA gene and its derived amino acid sequence are shown in full, and only differences are shown for the cDNA sequences. An asterisk shows the only position in the sequenced where editing (C to T) does not result in an amino acid replacement.

### Figure S2

#### Editing sites in petB defined by differences in genomic and cDNA sequences.

The genomic sequence of the petB gene and its derived amino acid sequence are shown in full, and only differences are shown for the cDNA sequences. The asterisk shows the only position in the sequence where editing changes a stop codon to instead encode an amino acid (lysine).

DNA cDNA  
10 20 30 40 50 60 70 80 90  
GTATATTAATGTTCCCTCTCATTGGTTTGGCAATTGGTGCTTATATTTTCAGCTTTTATTTTTGCTCCGCCAGTAGATATTGATGGAATTA  
I L M F P L I G L A I G G Y I S A F I F A P P V D I D G I  
C  
A

DNA cDNA  
100 110 120 130 140 150 160 170 180  
GAGAACCAGTTGCTGGAAGTCTCTTGTATGGGAATAATATTATTACAGGAGCTGTTATACCAAGCTCAAATGCAATTGGTGTTCATTTTT  
R E P V A G S L L Y G N N I I T G A V I P S S N A I G V H F  
G  
V

DNA cDNA  
190 200 210 220 230 240 250 260 270  
ATCCAATTTGGGAGTCACTAGGTTTTGATGAGTGGTTATATAATGGTGGTACATATCAATTTGTTGTTTTGCATTTTTATTGTAGGTGTAT  
G  
Y P I W E S L G F D E W L Y N G G T Y Q F V V L H F I V G V  
V

DNA cDNA  
280 290 300 310 320 330 340 350 360  
CTTGTGGATGGGTAGAGAATGGGAATTTAGTTTTAGATTAGGAATGCGTCCATGGATTTTTATAGCTTTTTTCAGCACCTTTATAGCAG  
S C W M G R E W E F S F R L G M R P W I F I A F S A P L I A  
G  
V  
G  
V

DNA cDNA  
370 380 390 400 410 420 430 440 450  
CTTCAGCTATTTTTATATTTTATCCAATTTGGACAAGGAAGCTTTTCAGATGGTATGCCACTTGGTATTAGTGGCACATTTAATTTTTATGT  
G  
A S A I F I F Y P I G Q G S F S D G M P L G I S G T F N F M  
V

DNA  
460 470 480 490 500 510 520 530 540  
TAGTATTTCAAGCAGAGCATAACATTTTAATGCATCCATTTTCACATCTTAGGTGGCTGGTGTATTTGGAGGTTTCATTATTCAGTGCAA  
L V F Q A E H N I L M H P F H I L G V A G V F G G S L F S A

DNA cDNA  
550 560 570 580 590 600 610 620 630  
TGCATGGTTCATTAGTATCATCTTCACTTTTAGCAGAAAGTTCTGGAGATGTCTCACTTAATGTTGGTTATAATTTTGGTCAAGAAGATG  
C  
M H G S L V S S S L L A E S S G D V S L N V G Y N F G Q E D  
T

DNA cDNA  
640 650 660 670 \* 680 690 700 710 720  
AAACTTATAGTATCTCAGCTGCACATGGTATTTTTGGTCGTCTCATTTTTCAGTATGCAAGTTTAACTCACTCACGTAGTTTACATTTCT  
T  
E T Y S I S A A H G Y F G R L I F Q Y A S F N N S R S L H F

DNA cDNA  
730 740 750 760 770 780 790 800 810  
TTTTAGCTGGTTGGCCAGTTATTGGTATCTGGTTTACAGCACTTGGTGTAGTACAATGGCTTTCAATTTAAATGGGTTGAATTTTAATC  
C  
F L A G W P V I G I W F T A L G V S T M A F N L N G L N F N  
A

DNA cDNA  
820 830 840 850 860 870 880 890 900  
AGTCCATAATTGATTCATCAGGTCTCTATAAATAGTTGGGCTGATATAATTAATAGAGCAGATTTGGGTATGGAGGTTATGCATGAAC  
G  
Q S I I D S S G H L I N S W A D I I N R A D L G M E V M H E  
V

DNA  
GAAATG  
R N

Figure S1

DNA 10 20 30 40 50 60 70 80 90  
 cDNA TGATTGGTGTGAAGAAAGATTAGAGATTCAGTCTATTTTCAGATGATGTTTTAGCTAAATTCGTACCATCTCATGTAAATATATTTTATTG  
 D W C E E R L E I Q S I S D D V L A K F V P S H V N I F Y C  
 A  
 I

DNA 100 110 120 130 140 150 160 170 180  
 cDNA TTTTGGAGGTATTATATTGACATCTTTTATATTTCAAGTTGCTACAGTTTTGCTCTTACAATTTATTATCAACCTACAGTAGTTGAAGC  
 F G G I I L T S F I F Q V A T G F A L T I Y Y Q P T V V E A  
 G  
 V R

DNA 190 200 210 220 230 240 250 260 270  
 cDNA TTTCTCAAGTATTGAAAATATTTTATATCATGTGAATTTAGGCTGGTTTATTAATCTGTTTCATCGTTGGTCTTCAGGAGTTATGGTCT  
 F S S I E N I L Y H V N L G W F I K S V H R W S S G V M V L  
 G  
 R

DNA 280 290 300 310 320 330 340 350 360  
 cDNA TATATTAGCCCTTCATATAAATAGGGTTTATTTAACAGGAGGTTCTTAAAAACCAAGAGAATTAATTTGGATTACAGGTACAATATTAGC  
 G I L A L H I N R V Y L T G G S \* K P R E L I W I T G T I L A  
 V F K GT  
 V

DNA 370 380 390 400 410 420 430 440 450  
 TGTCACCTCTATATCATTGGTGTAACTGGTTATTCATTACCTTGGGACACAATTGGTTATTGGGCTTGAAAATTGTGACAGCTGTTCC  
 V T S I S F G V T G Y S L P W D T I G Y W A C K I V T A V P

DNA 460 470 480 490 500 510 520 530 540  
 cDNA GGAAGCATTAGATAATTTAATCCCAGGTGTTGGGAAAATATCTGTTATAATTTTGAGAGGAGGGTTTAGTGCAATCAAATTACTTTGAC  
 E A L D N L I P G V G K I S V I I L R G G F S V N Q I T L T  
 G  
 D S A GC

DNA 550 560 570 580 590 600  
 cDNA AAGATTTTACAGTATTCATACATTTATTTTGGCATTAGCGACTTTAATTTTAGTAGTAGTTCATTTTC  
 R F Y S I H T F I L P L A T L I L V V V H F S  
 G  
 V V I A

Figure S2
